# Supplementary material
Source: publisher site journal article supplement (https://www.dovepress.com/get_supplementary_file.php?f=282809.docx)
Supplement: Supplementary file 1 [file get_supplementary_file.php]

| **Tight junctions** | **Adherens Junctions** | **Cytosolic plaque proteins** |
| --- | --- | --- |
| **Claudin family** | **Cadherin family** | **Catenin family** |
| Claudin 1-27 | E-cadherin | a-catenin, b-catenin, p120 catenin |
|
|  |  |  |
| **TAMP family** | **Nectin family** |  |
| Occludin |  |  |
| Tricellulin |  |
| MarvelD3 |  |  |
|  |  |  |
| **ZO family** |  | **Others** |
| ZO-1, ZO-2, ZO-3 |  | α-actinin, cortactin |
|  |  |
| **Immunoglobulin family** |  |  |
| JAMs |  |  |
| CAR |  |  |

Supplementary Table1 | Major tight junctions (TJs), adherent junctions (AJs) and plaque proteins
